# Supplementary material for: Analysis of the measurement uncertainty for a 3D wind-LiDAR
Source: Copernicus journal article supplement (doi:10.5194/amt-2023-184), 2024-03-12
Supplement: Supplementary file [file amt-2023-184-AC1-supplement.pdf]

# Analysis of the measurement uncertainty for a 3D wind-LiDAR - Reply to RC1 from Referee #1

Wolf Knöllner<sup>1</sup>, Gholamhossein Bagheri<sup>2</sup>, Philipp von Olshausen<sup>1</sup>, and Michael Wilczek<sup>2,3</sup>

<sup>1</sup>Fraunhofer Institute for Physical Measurement Techniques IPM, Freiburg, Germany

<sup>2</sup>Max Planck Institute for Dynamics and Self-Organization (MPI-DS), Göttingen, Germany

<sup>3</sup>Theoretical Physics I, University of Bayreuth, Bayreuth, Germany

August 30, 2024

**Review:** *The authors present an analysis of how Normally distributed errors in line-of-sight velocity measurements and turbulence can potentially impact the error in 3D wind estimates for the CloudKite Turbulence LiDAR (CTL). The concept proposed for this work is very important to building wind sensors and is a necessary analysis to such an instrument development. It's relevant in scope for AMT if the analysis is conducted accurately and robustly. However, I am not convinced that the simulated errors are modeled correctly. As such, the analysis becomes circular where the assumed noise characteristics are artificially imposed on both the simulated and experimental data and the efficacy of the solutions are reliant on the assumed model being accurate.*

*The central issue with this manuscript is how the wind uncertainty is modeled. I am skeptical that it represents an accurate description of uncertainty in such a wind measurement system. If the authors are correct in how the noise is modeled, the manuscript needs to include a robust justification. If this noise model is incorrect, the analysis needs to be updated so that it accurately models the instrument and its uncertainties.*

*What follows are four points regarding the content of the manuscript (with one aside on the instrument). The most important point, and most significant barrier to my approving this for publication is the first item. Most of the other topics are tangentially related to my concern with the noise model.*

**Reply:** Thank you for raising these points while confirming the importance of modeling such a system. We address your concerns in the following sections.

## **Review:**

### **Noise model**

*Stated in section 2.1: "As the detection is shot noise limited, a Gaussian distribution is assumed, for which  $\sigma = \text{FWHM}/(2\sqrt{2\ln 2})$ . Consequently, a detector uncertainty in terms of standard deviation can conservatively be estimated to be  $\sigma_{det} = 0.04 \text{ ms}^{-1}$ . Also, the LiDAR system has an internal reference channel which suggests that the detector noise is even below  $0.04 \text{ ms}^{-1}$ "*

*Detectors don't output velocities. Detector noise manifests as an analog voltage at the output of the detector. That output is typically digitized, and stored as a fixed length time series, passed through an FFT operation to which a peak finding algorithm is applied. The corresponding peak frequency corresponds to a line-of-sight velocity dependent on the wavelength of the light. I cannot intuitively see how Poisson noise (shot noise is Poisson not normally distributed) results in Normally distributed independent line-of-sight velocities. Furthermore, I would expect uncertainty in velocity is highly dependent on the amount of aerosol loading in the scattering volume. Typically peaks in spectra resulting from air motion are very easy to find when the backscatter is high (significantly above variations in the noise floor and those systematic variations in the baseline we all pretend don't exist in our instruments), but as the peak height drops near the noise floor, the velocity error tends to increase rather rapidly (and is probably not normally distributed). In order to increase the signal to noise ratio, one typically does not average velocity estimates (as done in this analysis), but instead averages FFT spectra before applying the peak finding algorithm. Factors that would tend more towards the uncertainty described in this manuscript would have to do with the resolution of the system (which means subsequent samples are not generally independent and therefore effectively suppressed with averaging). Those would be terms such as laser line width, windowing function and the FFT sequence length.*

*There is a caveat to my comments here because while I can say that I have analyzed 3D wind sensor data before (not unlike what is described here) that instrument did not employ FMCW. It is not entirely clear to me if I am missing how FMCW would alter the way noise manifests in the eventual line-of-sight velocity estimate. If FMCW alters this, such that the presented noise model is a valid representation of the effects of shot noise, the authors need to robustly show it. As part of this, it would be very helpful if they would provide a more thorough description of the FMCW scheme being employed (e.g. specific modulation scheme) and how the raw data is processed to obtain a line-of-sight wind measurement.*

**Reply:** We appreciate the criticism as more precision in our assumption and derivations is needed. For this reason, we've added a new section, 2.2 Measurement uncertainty, to the manuscript which explains the assumptions in detail.

The first issue is our assumption of normally distributed line-of-sight velocity measurements. We agree with the reviewer's description of what happens with the detector voltage to ultimately yield a velocity. No FMCW specialties come into play here. On the detector we have the coherent interference of the local oscillator with the signal. The local oscillator is adjusted so that it is the dominant noise term, hence we are in the shot noise limited detection scheme. Consequently, there are many photons arriving on the detector (more precisely: on each of the two balanced photo detectors). Also, having a peak coming out of the noise floor (otherwise the wind velocity can not be extracted, which can happen in reality, of course) means that there is also a significant number of signal photons involved. For large numbers of photons the Poisson distribution approximates the normal distribution very well.

Now the subsequent question is: Does the dominance of white noise lead to an uncertainty of the peak position that is normally distributed? We have performed a simple simulation of a beat signal with added white noise, averaged 4000 spectra as in a typical measurement, and analysed the peak positions which were found by fitting a Gaussian function (see Appendix C). The result shows two things:

1. The peak positions and thus the velocities follow a normal distribution. It makes intuitively sense that the uncertainty of the peak position follows a symmetric function. The Poisson distribution is not symmetric for small mean values, but it approximates the normal distribution well for large mean values.
2. Increasing the level of added white noise, i. e. decreasing the signal-to-noise (SNR) ratio, leads to an increase in the fluctuation of the peak positions (the measured wind velocity). This confirms the reviewer's assumption that a decreasing SNR leads to increased uncertainty. However, it remains normally distributed for low SNR.

Regarding the three potential noise sources that are mentioned:

- ▷ Laser line width: We assume a typical measurement distance of  $d = 15$  m. The resulting travelling time of the photons is  $t = 2 \cdot d/c \approx 100$  ns. On this timescale, the laser is very stable.
- ▷ Windowing function: Every slice of raw data is multiplied with a Flattop window function before performing the FFT. We have a sampling rate of 491.52 MHz and typical chunk size of 4096 data points which yields a frequency spacing of 120 kHz. As the main lobe of a Flattop window in frequency space is about 4 bins wide (full width half maximum), we get a width of the peak (one  $\sigma$ ) of approximately  $2 \cdot 120\text{kHz} = 0.24\text{MHz}$ . This broadens the peak but does not influence its position.
- ▷ FFT length: As mentioned in the previous paragraph, a typical FFT length is 4096 data points. This results in a frequency spacing of  $df = 120$  kHz which equals a velocity uncertainty of  $dv = \lambda \cdot df/2 = 0.093 \text{ ms}^{-1}$ , where the wavelength is  $\lambda = 1545$  nm. This provides an order of magnitude for the velocity uncertainty and ignores the possibilities of sub-sampling resolution due to peak fitting.

A FMCW scheme is different in detail from a CW or a pulsed wind LiDAR but does not alter the general noise considerations discussed here.

We have added a brief description of the used FMCW scheme and a more thorough description of our derivation of the measurement uncertainty to the manuscript.

**Review: Dependence on Sampling Rate**

*The section investigating a dependence on sampling rate does not strike me as an accurate analysis of the tradeoffs in sampling. Inherently moving to a higher sampling rate will*

- ▷ Change the frequency resolution and Nyquist frequency of the FFT
- ▷ Change the noise characteristics

*An analysis using the same noise model and assuming the same Normally distributed noise characteristics basically assumes that one gets something for free from higher sampling rates. That's not the case. In general, assuming the detector and anti-aliasing filters can support the increased bandwidth, one would expect the noise amplitude to go up because what comes with increased sampling rates is shorter integration times and comparatively less noise suppression.*

**Reply:** We thank the reviewer especially for this comment as it highlights a misunderstanding due to our poorly chosen wording. We are actually referring to a measurement rate, not a sampling rate. We have adapted this throughout the manuscript. Also, we have added a brief section on how the measurement value (wind velocity) is derived from the data.

When changing the measurement rate this means that a different number of individual spectra (derived by doing FFTs on sampled raw data sections) are averaged. The sampling rate, referring to the digitization of the voltage values of the detector, is not changed. Consequently, the frequency resolution and the Nyquist frequency are not changed when changing the measurement rate.

However, for a given signal the noise characteristics will generally change when changing the measurement rate. We assume that a different measurement rate is chosen due to different environment conditions (aerosol density). This means that the signal-to-noise ratio would be very comparable. We have clarified this in the manuscript.

**Review:** *Section 5.1 Uncertainty analysis with experimental wind data*

*The approach described in this section might make sense if my principle concerns about the analysis had to do with the accuracy of the wind simulations. However I'm concerned about the accuracy of the instrument noise model, which is not encapsulated in this analysis at all. To my perspective this is just another case of synthetic data, and does not reassure me that the authors are accurately modeling the instrument.*

**Reply:** Indeed, the analysis of experimental wind data is not done to validate the noise model. Rather, this analysis is included as an additional example, using experimentally measured wind values instead of simulated input. This also shows that the chosen approach holds true for the analysis of realistic wind data, here derived from an experimental campaign. As such, this underpins the approach of choosing an Ornstein-Uhlenbeck process to model wind.

**Review:** *Appendix A: Geometric tolerances*

*I was somewhat bothered by this statement: "We expect this to be a negligible source of error since the precise geometric dimensions of the measurement frame can be measured before mounting of the device to the Cloud-Kite balloon. This includes the distances between the telescopes (sidelength), but also the distance and lateral position of the focus." This isn't reassuring because it just says the authors assume it's not an issue. Since we all know there is no such thing as exact dimensions, it would be advisable to include an analysis of the tolerances in those dimensional measurements and how they propagate to uncertainty in the wind measurement. Some description of how the beam pointing is determined is also helpful (e.g. see 2.3.2 in Cooper et al 2016 – full reference below). Without that analysis, this just looks like a convenient assumption.*

**Reply:** While the three beams are easy to align to meet in one point in space in the lab, it will indeed be difficult to assure that all three beams are perfectly symmetrical and hit the common focal point under the exact same angle. Thank you also for the reference describing an approach to solve this problem.

Fraunhofer IPM has a 3D laser tracker available for exactly these types of measurement. It is regularly used for calibrating different types of multi-sensor systems. As a precise calibration provides all data to compensate for this error, we do not consider this effect essential for the analysis performed in this paper.

We have rephrased the paragraph in the appendix to be more precise.

**Review: Comment on the architecture**

*While not directly relevant to the review of this paper, I am concerned about the minimalist design of this instrument. Using 3 beams to measure a 3D wind vector leaves one relatively blind to unexpected error sources (this is based on personal experience). I would highly recommend that the CTL design include at least one additional beam. By having four line-of-sight velocity measurements, the estimation problem becomes over constrained and it creates a mechanism for detecting unexpected errors and biases in the instrument. This often becomes another source of irritation in the testing process (when you have to track down the errors you forgot to consider), but if you are committed to making an accurate measurement, it's essential insurance to catch those errors.*

**Reply:** Thank you very much for this advice and for sharing your experience. While having only three beams for measurement, we do have a fourth, internal channel (reference channel). This consists of a long glass fiber representing the signal path and a balanced photo detector where this signal and the local oscillator interfere. Of course, this does not over-constrain the measurement and is, consequently, not identical to having a fourth beam. However, it does provide some quality control of crucial system parameters, as e. g. the laser light source. This approach was chosen due to the constraints in available space and load (weight) on the Cloud Kite platform.
